# Supplementary material
Source: publisher site journal article supplement (https://www.dovepress.com/get_supplementary_file.php?f=357864.docx)
Supplement: Supplementary file 1 [file get_supplementary_file.php]

# Supplementary materials: Health state descriptions

**Scenario 1: Up-dosing**

- Up-dosing lasts for 6 months and aims to gradually build up the amount of peanut you can tolerate to achieve a maintenance dose equivalent to about 1 peanut
- During that time, you need to visit your doctor’s clinic at the start of treatment and every 2 weeks to increase the amount of peanut protein in your dose. Each visit lasts 2-3 hours
- Between clinic visits you take a daily treatment containing a small amount of peanut protein at home, at the same time each day
- During this process you may be up to 10% more likely to experience a moderate allergic reaction, such as stomach pain (due to taking a daily dose of peanut protein) than you would be in usual day to day life when actively avoiding peanut
- While you are taking a daily dose, you do not know the exact amount of peanut you would be able to tolerate in an accidental exposure
- You need to:
  - Avoid eating peanuts or products containing peanuts apart from the treatment
  - Carry two adrenaline auto-injectors (AAI)
  - Be supervised by a caregiver (e.g., parent) for an hour after each dose and avoid doing sports / strenuous physical activity or having a hot bath / shower around the time you take the treatment (e.g., taking the dose at breakfast time could fit your daily routine)
- The treatment is a powder mixed into cold soft food (such as yoghurt)
- Throughout treatment you will be supported by a medical team should dose changes be required

**Scenario 2: Maintenance**

- You have completed the up-dosing phase and now take a daily maintenance treatment at home, at the same time each day
- Your treatment maintenance dose is equivalent to **1 peanut**.
- **Your risk of experiencing a reaction from accidentally eating something containing a trace amount of peanut (such as a biscuit or ice cream) is reduced by at least 95%.**
- **You do not know the exact amount of peanut you can tolerate per accidental exposure, it may be between 1 to 8 peanuts.**
- You need to:
  - Avoid eating peanuts or products containing peanuts apart from the treatment
  - Carry two adrenaline auto-injectors (AAI)
  - Be supervised by a caregiver (e.g., parent) for an hour after each dose and avoid doing sports / strenuous physical activity or having a hot bath / shower around the time you take the treatment (e.g., taking the dose at breakfast time could fit your daily routine)
- The treatment is a powder mixed into cold soft food (such as yoghurt)
- Throughout treatment you will be supported by a medical team should dose changes be required

**Scenario 3: Tolerate 2000mg (6-8 peanuts)**

- You take a daily treatment containing a small amount of peanut protein (equivalent to 1 peanut) at home, at the same time each day
- **You have been told that if you were to accidentally eat a product containing peanuts, you would be able to tolerate the equivalent of 6-8 peanuts**
- You need to:
  - Avoid eating peanuts or products containing peanuts apart from the treatment
  - Carry two adrenaline auto-injectors (AAI)
  - Be supervised by a caregiver (e.g., parent) for an hour after each dose and avoid doing sports / strenuous physical activity or having a hot bath / shower around the time you take the treatment (e.g., taking the dose at breakfast time could fit your daily routine)
- The treatment is a powder mixed into cold soft food (such as yoghurt)
- Throughout treatment you will be supported by a medical team should dose changes be required
